# Supplementary material for: Amplified fluorescence determination of microRNAs in homogeneous solution with cationic conjugated polymers
Source: Royal Society of Chemistry journal article supplement (doi:10.1039/b816614e), 2008-01-01
Supplement: b816614e.pdf [file b816614e.pdf]

## Supporting Information

### Amplified fluorescence determination of MicroRNAs in Homogeneous solution with cationic conjugated Polymers

Yali Zhang,<sup>a,b</sup> Zhengping Li\*<sup>a</sup> and Yongqiang Cheng<sup>a</sup>

<sup>a</sup>Key Laboratory of Medical Chemistry and Molecular Diagnosis, Ministry of Education; College of Chemistry and Environmental Science, Hebei University, Baoding 071002, Hebei Province, P. R. China. Email: [lzpbd@hbu.edu.cn](mailto:lzpbd@hbu.edu.cn); Fax: +86 312 5079403

<sup>b</sup>College of Sciences, Hebei University of Science and Technology, Shijiazhuang050018, Hebei Province, P. R. China,

### Experimental Section

#### Materials and Reagents

The PFP was synthesized according to the procedure in the literature.<sup>1</sup> The chemical structure of PFP is shown in Figure S1. Klenow Fragment (3'→5' exo<sup>-</sup>) was purchased from Shanghai Sangon Biological Engineering Technology & Services Co., Fluorescein-12-dATP was purchased from PerkinElmer Life and Analytical Sciences, Ribonuclease Inhibitor, PAGE-purified DNA, and HPLC-purified miRNA oligonucleotides were purchased from TakaRa Biotechnology Co. Ltd. (Dalian, China). The concentration of the oligonucleotides was determined by measuring the absorbance at 260 nm in a 100 μL quartz cuvette by using a TU 1901 UV-Vis spectrophotometer (Purkinje General Instrument Co., Ltd., Beijing, China).

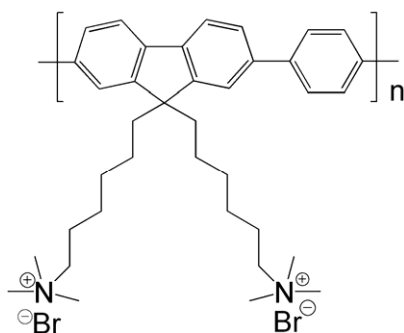

Figure S1. Chemical Structures of PFP

The miRNA-primed extension reactions were carried out in 200 μL PCR microtubes and the reaction temperature was controlled by a T1 Thermal Cycler (Biomera, Germany). All solutions were prepared with DEPC-treated water except 0.2 M PBS buffer (10 mM sodium phosphate buffer containing 0.2 M NaCl, pH 7.4), which was prepared with Millipore filtration

system-purified (18.2 M $\Omega$ ) and sterilized water.

**miRNA assay.** In a 200  $\mu$ L PCR microtube, 4.0  $\mu$ L DNA probe ( $1.0 \times 10^{-6}$  M) and 2.0  $\mu$ L each miRNA were added into 10  $\mu$ L buffer (10 mM Tris-HCl, 50 mM NaCl, 10 mM MgCl<sub>2</sub>, 1 mM DTT, pH 7.9). The mixture solution was heated at 70  $^{\circ}$ C for 3 min, 55  $^{\circ}$ C for 1.5 h. After cooling to room temperature, 0.5  $\mu$ L Ribonuclease inhibitor, 1.0 unit (or 2.5 unit) Klenow Fragment (exo<sup>-</sup>) and 1.2  $\mu$ L dATP-FI ( $5.0 \times 10^{-6}$  M) were added in and incubated at 37  $^{\circ}$ C for 1 h to perform the extension reaction, After cooling to room temperature again, the extension solution was diluted with 0.2 M PBS buffer into 200  $\mu$ L and 8.0  $\mu$ L PFP ( $1.0 \times 10^{-5}$  M in RUs) was transferred in. Then the fluorescence spectra were measured in a 1 mL quartz cuvette with a Hitachi F-4500 spectrofluorimeter with a xenon lamp excitation source (Tokyo, Japan). The excitation wavelength is 380 nm.

### Absorption spectrum of dATP-FI and emission spectrum of PFP and

Fig. S2 shows the normalized absorption spectrum of dATP-FI and the emission spectrum of PFP. As illustrated in Fig. S2, the absorption spectrum of dATP-FI and the emission spectrum of PFP can well satisfy the overlap integral requirement for FRET, indicating that PFP and dATP-FI can be used as an ideal donor-acceptor pair for FRET. Therefore, the efficient FRET from PFP to dATP-FI can be observed when the dATP-FI is close to PFP by miRNA extension reaction.

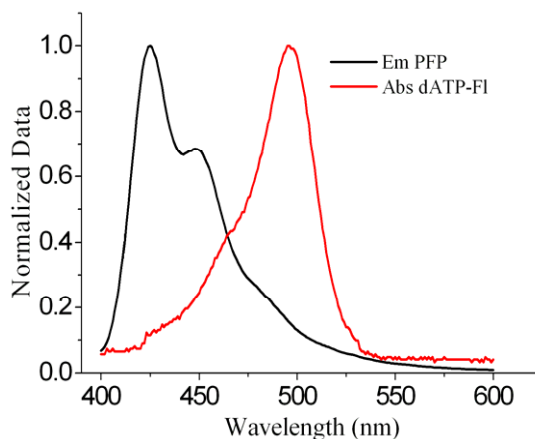

Figure S2. Normalized emission spectrum of PFP(Em PFP) and absorption spectrum of dATP-FI (Abs dATP-FI). The excitation wavelength of PFP is 380nm

1 M. Stork, B. S. Gaylord, A. J. Heeger and G. C. Bazan, *Adv. Mater.*, 2002, **14**, 361-366.
